# Supplementary material for: Engineered feature used to enhance gardening at a 3800-year-old site on the Pacific Northwest Coast
Source: PubMed Central journal article supplement — Sci Adv. 2016 Dec 21;2(12):e1601282. doi: 10.1126/sciadv.1601282 (PMC5176348; doi:10.1126/sciadv.1601282), 2016-12-21
Supplement: 1601282_SM.pdf [file 1601282_SM.pdf]

## Supplementary Materials for **Engineered feature used to enhance gardening at a 3800-year-old site on the Pacific Northwest Coast**

Tanja Hoffmann, Natasha Lyons, Debbie Miller, Alejandra Diaz, Amy Homan,  
Stephanie Huddleston, Roma Leon

Published 21 December 2016, *Sci. Adv.* **2**, e1601282 (2016)  
DOI: 10.1126/sciadv.1601282

### **The PDF file includes:**

- fig. S1. Radiocarbon sequence for DhRp-52.
- fig. S2. Plan view of SRP feature from garden area.
- fig. S3. Sample of conserved wapato (*S. latifolia*) tubers excavated from DhRp-52 wet-site deposits.
- table S1. Radiocarbon dates from DhRp-52.
- table S2. Frequency and distribution of abundant seed taxa in the garden deposits at DhRp-52.
- table S3. Total counts of perishable artifacts from DhRp-52.
- table S4. Species identification of a sample of perishable artifacts excavated from DhRp-52 wet-site (area II) deposits.

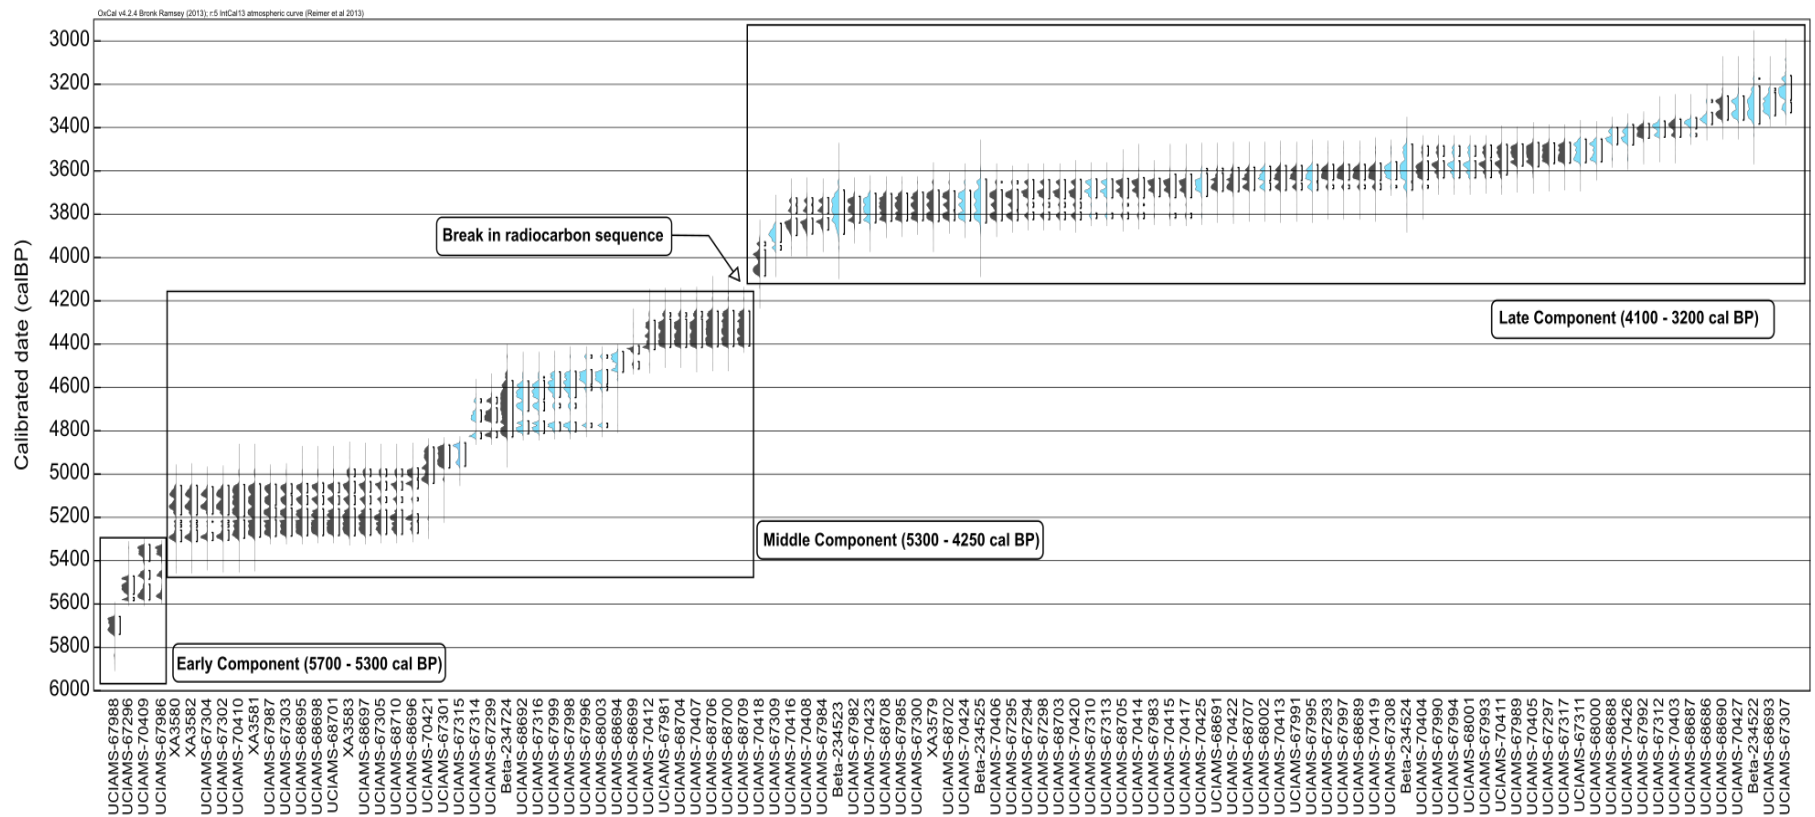

**fig. S1. Radiocarbon sequence for DhRp-52.** Blue lines indicate dates derived from wet-site samples. See table S1 for sampling provenience of each date.

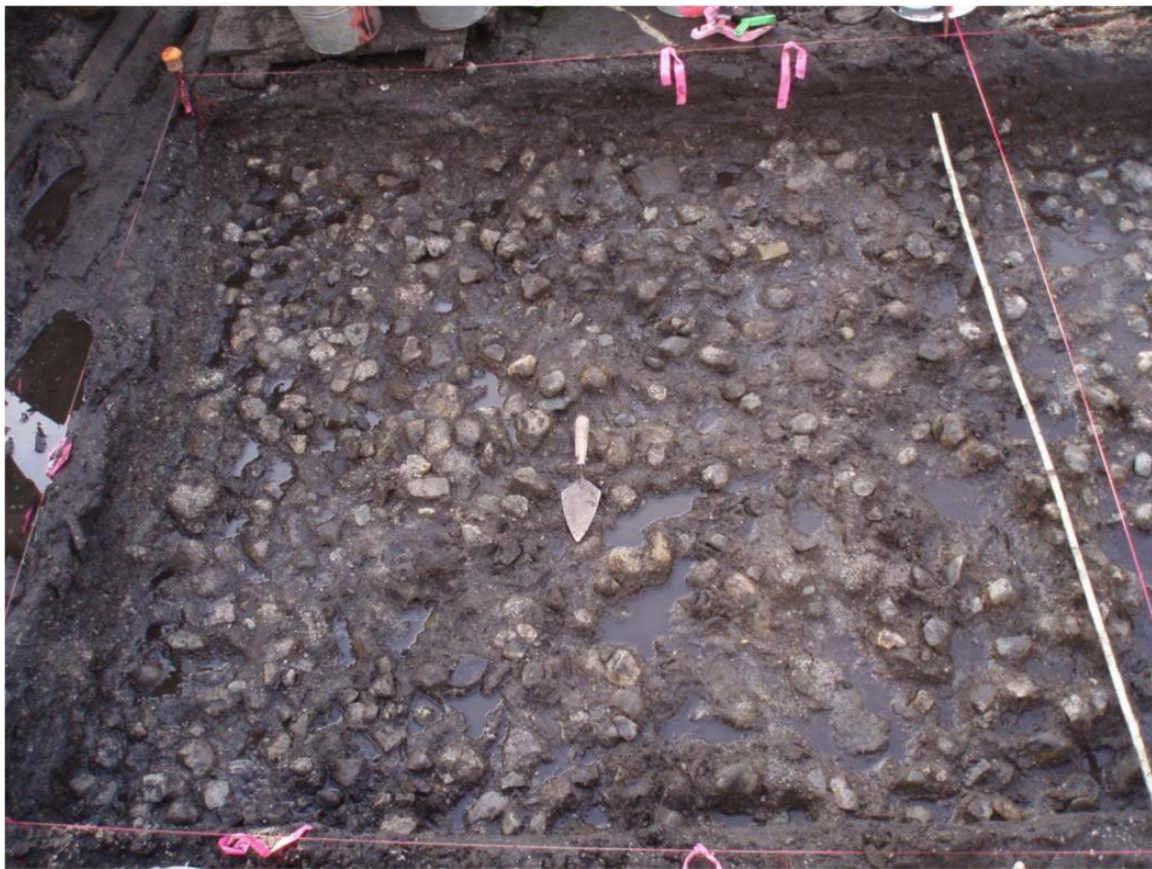

**fig. S2. Plan view of SRP feature from garden area. Pink string indicates boundary of 2 metre by 2 metre excavation unit. Trowel tip oriented north.**

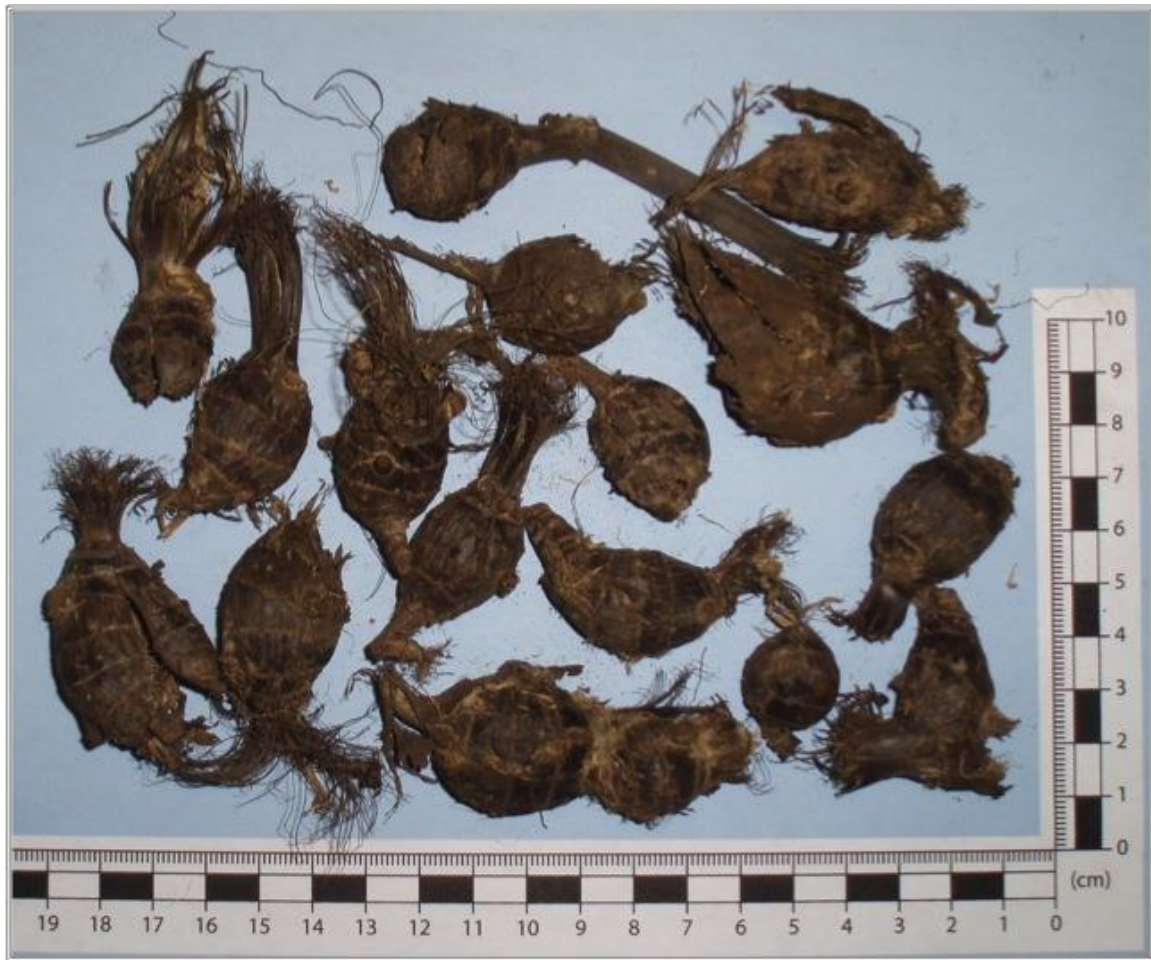

**fig. S3. Sample of conserved wapato (*S. latifolia*) tubers excavated from DhRp-52 wet-site deposits.**

**table S1. Radiocarbon dates from DhRp-52.** Those dates derived from artifacts or sediments recovered from the wet-site are highlighted in bold type and yellow highlighting. Note Site Area II include wet-site deposits, Site areas I, III, and IV are dry-site deposits.

| Lab No.            | Trench or Unit | Unit       | Depth (cm below datum1) | Site Area | Material                   | Conventional age BP             | Calibrated age BP (2 $\sigma$ ) | Context                                                      |
|--------------------|----------------|------------|-------------------------|-----------|----------------------------|---------------------------------|---------------------------------|--------------------------------------------------------------|
| XA3579             | 1              | BB13       | 190-200                 | III       | charcoal                   | 3478 $\pm$ 24                   | 3833 - 3689                     | Sediment IV and V: dry and wet deposit interface             |
| XA3580             | 1              | Q10        | 200-205                 | III       | charcoal                   | 4536 $\pm$ 25                   | 5312 - 5053                     | Rectangular Depression ZH-n: base of pit depression          |
| XA3581             | 2              | B32        | 180                     | III       | charcoal                   | 4496 $\pm$ 24                   | 5290 - 5046                     | Rectangular Depression ZH-m: associated with bone            |
| XA3582             | 3              | I20        | 136-140                 | III       | charcoal                   | 4534 $\pm$ 25                   | 5312 - 5053                     | Sediment V: base of depression                               |
| XA3583             | 2              | C18        | 160-167                 | III       | charcoal                   | 4472 $\pm$ 24                   | 5285 - 4978                     | Thermal Feature KC-n                                         |
| <b>Beta-234522</b> | <b>WS2</b>     | <b>2x2</b> | <b>232.1-242.1</b>      | <b>II</b> | <b><i>S. latifolia</i></b> | <b>3080 <math>\pm</math> 40</b> | <b>3380 - 3210</b>              | <b>Ecofact, DhRp-52:29916</b>                                |
| <b>Beta-234523</b> | <b>WS1</b>     | <b>2x2</b> | <b>239.4</b>            | <b>II</b> | <b>wood tool</b>           | <b>3510 <math>\pm</math> 40</b> | <b>3890 - 3690</b>              | <b>Artifact, DhRp-52:48</b>                                  |
| <b>Beta-234524</b> | <b>WS1</b>     | <b>2x2</b> | <b>234.9</b>            | <b>II</b> | <b>wood tool</b>           | <b>3350 <math>\pm</math> 40</b> | <b>3690 - 3470</b>              | <b>Artifact, DhRp-52:51</b>                                  |
| <b>Beta-234525</b> | <b>WS2</b>     | <b>2x2</b> | <b>250.1</b>            | <b>II</b> | <b>wood tool</b>           | <b>3470 <math>\pm</math> 40</b> | <b>3840 - 3640</b>              | <b>Artifact, DhRp-52:55</b>                                  |
| Beta-234724        | 2              | D6         | 154-159                 | III       | charcoal                   | 4150 $\pm$ 40                   | 4829 - 4569                     | Thermal Feature HP                                           |
| UCIAMS-67293       | 2              | A8         | 50-60                   | III       | charcoal                   | 3370 $\pm$ 15                   | 3682 - 3569                     | Thermal Feature ZH-q: sediment II                            |
| UCIAMS-67294       | 2              | A8         | 100-110                 | III       | charcoal                   | 3450 $\pm$ 15                   | 3824 - 3641                     | Thermal Feature ZH-q: sediment III                           |
| UCIAMS-67295       | 2              | A8         | 120-130                 | III       | charcoal                   | 3465 $\pm$ 15                   | 3827 - 3648                     | Thermal Feature ZH-q: interface III and V                    |
| UCIAMS-67296       | 2              | A8         | 140-150                 | III       | charcoal                   | 4765 $\pm$ 15                   | 5584 - 5471                     | Thermal Feature ZH-q: sediment V near basal level of feature |
| UCIAMS-67297       | 2              | A36        | 40-50                   | III       | charcoal                   | 3295 $\pm$ 15                   | 3565 - 3472                     | Sediment II                                                  |
| UCIAMS-67298       | 2              | A36        | 68-70                   | III       | charcoal                   | 3450 $\pm$ 15                   | 3824 - 3641                     | Thermal Matrices feature JO                                  |
| UCIAMS-            | 2              | A36        | 87-90                   | III       | charcoal                   | 4185 $\pm$ 15                   | 4831 - 4646                     | Sediment IV and V: interface                                 |



| Lab No.               | Trench or Unit | Unit     | Depth (cm below datum1) | Site Area | Material        | Conventional age BP | Calibrated age BP (2σ) | Context                                                                 |
|-----------------------|----------------|----------|-------------------------|-----------|-----------------|---------------------|------------------------|-------------------------------------------------------------------------|
| 67299<br>UCIAMS-67300 | 1              | O5       | 50-60                   | III       | charcoal        | 3485 ± 15           | 3829 - 3699            | Sediment II                                                             |
| UCIAMS-67301          | 1              | O5       | 80-90                   | III       | charcoal        | 4370 ± 15           | 4971 - 4866            | Rectangular Depression ZH-n: top of sediment IV                         |
| UCIAMS-67302          | 1              | O5       | 120-130                 | III       | charcoal        | 4525 ± 20           | 5245 - 5053            | Rectangular Depression ZH-n: middle of sediment IV                      |
| UCIAMS-67303          | 1              | O5       | 130-135                 | III       | charcoal        | 4490 ± 15           | 5285 - 5046            | Rectangular Depression ZH-n: middle of sediment IV with ochre           |
| UCIAMS-67304          | 1              | O5       | 170-175                 | III       | charcoal        | 4530 ± 15           | 5306 - 5057            | Rectangular Depression ZH-n: basal level of feature                     |
| UCIAMS-67305          | 3              | H34      | 139-144                 | III       | charcoal        | 4465 ± 15           | 5278 - 4978            | Sediment IVd                                                            |
| <b>UCIAMS-67306</b>   | <b>14</b>      | <b>3</b> | <b>208.2-228.2</b>      | <b>II</b> | <b>wood</b>     | <b>1410 ± 15</b>    | <b>1339 - 1294</b>     | <b>Sediment S2W</b>                                                     |
| <b>UCIAMS-67307</b>   | <b>14</b>      | <b>2</b> | <b>231.6-241.6</b>      | <b>II</b> | <b>charcoal</b> | <b>3020 ± 20</b>    | <b>3330 - 3161</b>     | <b>Sediment S3W: above the Submerged Rock Pavement feature</b>          |
| <b>UCIAMS-67308</b>   | <b>13</b>      | <b>4</b> | <b>221.8-231.8</b>      | <b>II</b> | <b>wood</b>     | <b>3355 ± 15</b>    | <b>3676 - 3559</b>     | <b>Sediment S3W: between Midden and Submerged Rock Pavement feature</b> |
| <b>UCIAMS-67309</b>   | <b>15</b>      | <b>3</b> | <b>238.8-248.8</b>      | <b>II</b> | <b>charcoal</b> | <b>3595 ± 15</b>    | <b>3965 - 3842</b>     | <b>Sediment S3W: below Submerged Rock Pavement</b>                      |
| <b>UCIAMS-67310</b>   | <b>15</b>      | <b>3</b> | <b>228.8-238.8</b>      | <b>II</b> | <b>wood</b>     | <b>3440 ± 15</b>    | <b>3818 - 3639</b>     | <b>Submerged Rock Pavement feature</b>                                  |
| <b>UCIAMS-67311</b>   | <b>12</b>      | <b>5</b> | <b>205.2-215.2</b>      | <b>II</b> | <b>wood</b>     | <b>3280 ± 20</b>    | <b>3561 - 3453</b>     | <b>Sediment S5W: middle of S5W</b>                                      |
| <b>UCIAMS-67312</b>   | <b>15</b>      | <b>5</b> | <b>198.5-218.5</b>      | <b>II</b> | <b>charcoal</b> | <b>3180 ± 15</b>    | <b>3443 - 3372</b>     | <b>Sediment S5W</b>                                                     |
| <b>UCIAMS-67313</b>   | <b>12</b>      | <b>5</b> | <b>235.2-245.2</b>      | <b>II</b> | <b>wood</b>     | <b>3440 ± 15</b>    | <b>3818 - 3639</b>     | <b>Sediment S6W: middle of S6W</b>                                      |
| <b>UCIAMS-67314</b>   | <b>12</b>      | <b>5</b> | <b>275.2-285.2</b>      | <b>II</b> | <b>charcoal</b> | <b>4200 ± 15</b>    | <b>4836 - 4653</b>     | <b>Sediment S7W: bottom of S7W</b>                                      |
| <b>UCIAMS-67315</b>   | <b>12</b>      | <b>5</b> | <b>285.2-295.2</b>      | <b>II</b> | <b>charcoal</b> | <b>4345 ± 15</b>    | <b>4961 - 4856</b>     | <b>Sediment S9W</b>                                                     |
| <b>UCIAMS-67316</b>   | <b>15</b>      | <b>5</b> | <b>248.5-258.5</b>      | <b>II</b> | <b>wood</b>     | <b>4125 ± 15</b>    | <b>4811 - 4551</b>     | <b>Sediment S10W: yellow sand lens</b>                                  |
| UCIAMS-67317          | 2              | A25      | 112                     | III       | charcoal        | 3290 ± 15           | 3563 - 3469            | Thermal Feature FO                                                      |
| UCIAMS-               | 2              | A13      | 110-120                 | III       | charcoal        | 3895 ± 15           | 4414 - 4256            | Sediment IV: associated with bottom of                                  |

| Lab No.               | Trench or Unit | Unit     | Depth (cm below datum1) | Site Area | Material        | Conventional age BP | Calibrated age BP (2σ) | Context                                                                        |
|-----------------------|----------------|----------|-------------------------|-----------|-----------------|---------------------|------------------------|--------------------------------------------------------------------------------|
| 67981<br>UCIAMS-67982 | 2              | A13      | 102-110                 | III       | charcoal        | 3510 ± 15           | 3840 - 3718            | bead concentration<br>Sediment V: associated with middle of bead concentration |
| UCIAMS-67983          | 2              | A13      | 70-80                   | III       | charcoal        | 3425 ± 15           | 3717 - 3635            | Sediment II: associated with top of bead concentration                         |
| UCIAMS-67984          | 2              | A34      | 50-53                   | III       | charcoal        | 3530 ± 15           | 3872 - 3724            | Sediment II: above Rectangular Depression ZH-m                                 |
| UCIAMS-67985          | 2              | A34      | 53-60                   | III       | charcoal        | 3490 ± 15           | 3829 - 3704            | Rectangular Depression ZH-m: top of sediment IV                                |
| UCIAMS-67986          | 2              | A34      | 97-100                  | III       | charcoal        | 4715 ± 15           | 5577 - 5327            | Rectangular Depression ZH-m: sediment VI lens                                  |
| UCIAMS-67987          | 2              | A34      | 110-118                 | III       | charcoal        | 4495 ± 15           | 5287 - 5048            | Rectangular Depression ZH-m: bottom of sediment IV                             |
| UCIAMS-67988          | 2              | A34      | 120-130                 | III       | charcoal        | 4985 ± 15           | 5740 - 5658            | Rectangular Depression ZH-m: below feature                                     |
| <b>UCIAMS-67989</b>   | <b>14</b>      | <b>1</b> | <b>235-245</b>          | <b>II</b> | <b>charcoal</b> | <b>3310 ± 15</b>    | <b>3575 - 3477</b>     | <b>Sediment S3W: top of S3W</b>                                                |
| <b>UCIAMS-67990</b>   | <b>14</b>      | <b>1</b> | <b>245-255</b>          | <b>II</b> | <b>charcoal</b> | <b>3335 ± 15</b>    | <b>3632 - 3484</b>     | <b>Sediment S3W: middle of S3W</b>                                             |
| <b>UCIAMS-67991</b>   | <b>14</b>      | <b>1</b> | <b>255-265</b>          | <b>II</b> | <b>charcoal</b> | <b>3380 ± 15</b>    | <b>3687 - 3575</b>     | <b>Sediment S3W: bottom of S3W</b>                                             |
| UCIAMS-67992          | 2              | B24      | 85                      | III       | charcoal        | 3200 ± 15           | 3448 - 3383            | Sand Concentration Lens A: associated with Large Circular Depression           |
| UCIAMS-67993          | 2              | B24      | 107                     | III       | charcoal        | 3330 ± 15           | 3629 - 3482            | Sand Concentration Lens B: associated with Large Circular Depression           |
| <b>UCIAMS-67994</b>   | <b>12</b>      | <b>5</b> | <b>202.2</b>            | <b>II</b> | <b>charcoal</b> | <b>3335 ± 15</b>    | <b>3632 - 3484</b>     | <b>Sediment S5W: top of S5W</b>                                                |
| <b>UCIAMS-67995</b>   | <b>12</b>      | <b>5</b> | <b>218.2</b>            | <b>II</b> | <b>wood</b>     | <b>3380 ± 20</b>    | <b>3688 - 3572</b>     | <b>Sediment S5W: bottom of S5W</b>                                             |
| <b>UCIAMS-67996</b>   | <b>12</b>      | <b>5</b> | <b>254.2</b>            | <b>II</b> | <b>wood</b>     | <b>4075 ± 15</b>    | <b>4783 - 4451</b>     | <b>Sediment S6W: bottom of S6W</b>                                             |
| <b>UCIAMS-67997</b>   | <b>12</b>      | <b>5</b> | <b>227.2</b>            | <b>II</b> | <b>wood</b>     | <b>3370 ± 15</b>    | <b>3682 - 3569</b>     | <b>Sediment S6W: top of S6W</b>                                                |
| <b>UCIAMS-67998</b>   | <b>12</b>      | <b>5</b> | <b>264.2</b>            | <b>II</b> | <b>wood</b>     | <b>4100 ± 20</b>    | <b>4804 - 4526</b>     | <b>Sediment S7W: top of S7W</b>                                                |
| <b>UCIAMS-67999</b>   | <b>12</b>      | <b>5</b> | <b>268.2</b>            | <b>II</b> | <b>wood</b>     | <b>4105 ± 15</b>    | <b>4801 - 4529</b>     | <b>Sediment S7W: middle of S7W</b>                                             |
| <b>UCIAMS-</b>        | <b>15</b>      | <b>5</b> | <b>213.5</b>            | <b>II</b> | <b>wood</b>     | <b>3275 ± 15</b>    | <b>3557 - 3454</b>     | <b>Sediment S5W</b>                                                            |

| Lab No.                      | Trench or Unit | Unit     | Depth (cm below datum1) | Site Area | Material            | Conventional age BP | Calibrated age BP (2σ) | Context                                                           |
|------------------------------|----------------|----------|-------------------------|-----------|---------------------|---------------------|------------------------|-------------------------------------------------------------------|
| <b>68000</b><br>UCIAMS-68001 | <b>15</b>      | <b>5</b> | <b>218.5</b>            | <b>II</b> | <b>wood</b>         | <b>3335 ± 15</b>    | <b>3632 - 3484</b>     | <b>Submerged Rock Pavement feature</b>                            |
| UCIAMS-68002                 | 15             | 5        | 237.5                   | II        | wood                | 3385 ± 15           | 3688 - 3579            | Sediment S3W: below the Submerged Rock Pavement feature           |
| UCIAMS-68003                 | 15             | 5        | 262.5                   | II        | wood                | 4075 ± 15           | 4783 - 4451            | Sediment S7W: bottom of S7W                                       |
| UCIAMS-68686                 | 11             | 2        | 201.4-206.4             | II        | charcoal            | 3125 ± 15           | 3385 - 3273            | Sediment S2W: top of S2W                                          |
| UCIAMS-68687                 | 11             | 2        | 211.4-215.4             | II        | charcoal            | 3155 ± 15           | 3440 - 3354            | Sediment S2W: middle of S2W                                       |
| UCIAMS-68688                 | 11             | 2        | 220.4-225.4             | II        | charcoal            | 3235 ± 15           | 3477 - 3401            | Sediment S2W: bottom of S2W                                       |
| UCIAMS-68689                 | WS3            | 2x2      | 151.8-154.8             | I         | charcoal            | 3370 ± 15           | 3682 - 3569            | Sediment S2W                                                      |
| UCIAMS-68690                 | WS3            | 2x2      | 164.8-174.8             | I         | charcoal            | 3085 ± 20           | 3365 - 3255            | Sediment S3W                                                      |
| UCIAMS-68691                 | 7              | 9/10     | 226.7                   | I         | charcoal            | 3400 ± 15           | 3694 - 3589            | Sediment S3W: in machine bulk sample                              |
| UCIAMS-68692                 | <b>11</b>      | <b>6</b> | <b>237-247</b>          | <b>II</b> | <b>S. latifolia</b> | <b>4130 ± 15</b>    | <b>4813 - 4571</b>     | <b>Ecofact, DhRp-52:30017: from sediment S7W</b>                  |
| UCIAMS-68693                 | <b>14</b>      | <b>1</b> | <b>213-233</b>          | <b>II</b> | <b>S. latifolia</b> | <b>3060 ± 15</b>    | <b>3345 - 3219</b>     | <b>Ecofact, DhRp-52:29978: from sediment S2W</b>                  |
| UCIAMS-68694                 | <b>13</b>      | <b>5</b> | <b>260.8-270.8</b>      | <b>II</b> | <b>worked bark</b>  | <b>4030 ± 15</b>    | <b>4528 - 4436</b>     | <b>Artifact, DhRp-52:15294: from sediment S7W</b>                 |
| UCIAMS-68695                 | 3              | J12      | 114-116                 | III       | charcoal            | 4485 ± 15           | 5283 - 5044            | Rectangular Depression ZH-o                                       |
| UCIAMS-68696                 | 3              | J14      | 90-100                  | III       | charcoal            | 4450 ± 15           | 5273 - 4973            | Boiling Stone Cache OH: located in Rectangular Depression ZH-o    |
| UCIAMS-68697                 | 1/3            | Q10      | 200-205                 | III       | charcoal            | 4470 ± 20           | 5282 - 4978            | Rectangular Depression ZH-n: base of ZH-n within a pit depression |
| UCIAMS-68698                 | 1/3            | M2       | 139-140                 | III       | charcoal            | 4480 ± 15           | 5282 - 5042            | Ochre Concentration ZK-c                                          |
| UCIAMS-68699                 | 1/3            | P7       | 72-75                   | III       | charcoal            | 3960 ± 15           | 4513 - 4409            | Thermal Feature PA-f: above Rectangular Depression ZH-n           |
| UCIAMS-68700                 | 1/3            | P7       | 91-94                   | III       | charcoal            | 3880 ± 20           | 4409 - 4246            | Thermal Feature PA-I: above Rectangular Depression ZH-n           |
| UCIAMS-                      | 3              | L4       | 165-170                 | III       | charcoal            | 4480 ± 15           | 5282 - 5042            | Rectangular Depression ZH-n: basal                                |



| Lab No.               | Trench or Unit | Unit | Depth (cm below datum1) | Site Area | Material | Conventional age BP | Calibrated age BP (2σ) | Context                                                                                           |
|-----------------------|----------------|------|-------------------------|-----------|----------|---------------------|------------------------|---------------------------------------------------------------------------------------------------|
| 68701<br>UCIAMS-68702 | 2              | A18  | 46-60                   | III       | charcoal | 3475 ± 15           | 3828 - 3693            | sediment IVd<br>Sediment II: associated with top of bead concentration                            |
| UCIAMS-68703          | 2              | A18  | 63-68                   | III       | charcoal | 3450 ± 15           | 3824 - 3641            | Sediment II: associated with middle of bead concentration within coarse orange sands and charcoal |
| UCIAMS-68704          | 2              | A18  | 66-80                   | III       | charcoal | 3895 ± 15           | 4414 - 4256            | Sediment IV: associated with bottom of bead concentration                                         |
| UCIAMS-68705          | 2              | A19  | 54-64                   | III       | charcoal | 3435 ± 20           | 3821 - 3635            | Sediment II: associated with middle of bead concentration within coarse orange sands and charcoal |
| UCIAMS-68706          | 2              | H27  | 81                      | III       | charcoal | 3885 ± 20           | 4411 - 4248            | Thermal Feature JL                                                                                |
| UCIAMS-68707          | 2              | C1   | 60-62                   | III       | charcoal | 3390 ± 15           | 3689 - 3584            | Sediment II: interface of sediment II and IV                                                      |
| UCIAMS-68708          | 2              | C1   | 62-70                   | III       | charcoal | 3495 ± 15           | 3832 - 3706            | Sediment IV: interface of sediment II and IV                                                      |
| UCIAMS-68709          | 3              | N13  | 70-77                   | III       | charcoal | 3880 ± 15           | 4408 - 4248            | Rectangular Depression ZH-n: sediment II at II/IV interface                                       |
| UCIAMS-68710          | 3              | N13  | 77-80                   | III       | charcoal | 4465 ± 15           | 5278 - 4978            | Rectangular Depression ZH-n: sediment IV at II/IV interface                                       |
| UCIAMS-70403          | 6x6            | F4   | 55.8-65.8               | I         | charcoal | 3170 ± 20           | 3444 - 3361            | Sediment II: located in the 6x6                                                                   |
| UCIAMS-70404          | 6x6            | F4   | 115.8-121.8             | I         | charcoal | 3350 ± 20           | 3679 - 3485            | Sediment II: located in the 6x6                                                                   |
| UCIAMS-70405          | 2              | A23  | 105-110                 | III       | charcoal | 3305 ± 20           | 3581 - 3469            | Sediment IV: below Sand Concentration Lens B                                                      |
| UCIAMS-70406          | 2              | B36  | 87                      | III       | charcoal | 3470 ± 20           | 3830 - 3650            | Thermal Matrices JO                                                                               |
| UCIAMS-70407          | 3              | M11  | 75-77                   | III       | charcoal | 3895 ± 20           | 4415 - 4250            | Thermal Feature MJ                                                                                |
| UCIAMS-70408          | 2              | C32  | 68                      | III       | charcoal | 3540 ± 20           | 3891 - 3725            | Sand Concentration GI: within rectangular depression ZH-m                                         |
| UCIAMS-70409          | 2              | B34  | 118                     | III       | charcoal | 4720 ± 25           | 5581 - 5326            | Sand Concentration IH: located along the edge of rectangular depression ZH-m                      |
| UCIAMS-70410          | 2              | A31  | 162                     | III       | charcoal | 4505 ± 25           | 5296 - 5049            | Rectangular Depression ZH-m: basal level of feature                                               |
| UCIAMS-               | 2              | H21  | 63-70                   | III       | charcoal | 3325 ± 20           | 3618 - 3478            | Sediment IV                                                                                       |

| Lab No.               | Trench or Unit | Unit     | Depth (cm below datum1) | Site Area | Material            | Conventional age BP | Calibrated age BP (2σ) | Context                                                          |
|-----------------------|----------------|----------|-------------------------|-----------|---------------------|---------------------|------------------------|------------------------------------------------------------------|
| 70411<br>UCIAMS-70412 | 2              | H21      | 120-130                 | III       | charcoal            | 3925 ± 20           | 4425 - 4290            | Sediment V                                                       |
| UCIAMS-70413          | 2              | F22      | 78-82                   | III       | charcoal            | 3385 ± 20           | 3690 - 3576            | Thermal Matrices KB-e                                            |
| UCIAMS-70414          | 2              | H7       | 94                      | III       | charcoal            | 3430 ± 20           | 3820 - 3635            | Thermal Feature HE                                               |
| UCIAMS-70415          | 2              | F3       | 85-88                   | III       | charcoal            | 3425 ± 20           | 3817 - 3615            | Thermal Feature HO                                               |
| UCIAMS-70416          | 3              | N19      | 128                     | III       | charcoal            | 3545 ± 20           | 3898 - 3725            | Thermal Feature MA: Bottom of feature                            |
| UCIAMS-70417          | 3              | K20      | 92                      | III       | charcoal            | 3425 ± 20           | 3817 - 3615            | Thermal Feature HS                                               |
| UCIAMS-70418          | 3              | N19      | 60-70                   | III       | charcoal            | 3675 ± 20           | 4085 - 3928            | Thermal Feature MA: Top of feature                               |
| UCIAMS-70419          | 1              | BB7      | 192-196                 | III       | charcoal            | 3370 ± 20           | 3687 - 3565            | Thermal Feature PC-o: interface of dry and wet deposits          |
| UCIAMS-70420          | 1              | X8       | 111                     | III       | charcoal            | 3450 ± 20           | 3826 - 3640            | Sediment IV and V: interface of dry and wet deposits             |
| UCIAMS-70421          | 2              | E36      | 98                      | III       | charcoal            | 4405 ± 20           | 5043 - 4876            | Thermal Feature LY                                               |
| UCIAMS-70422          | 2              | F25      | 97                      | III       | charcoal            | 3400 ± 20           | 3695 - 3585            | Thermal Feature FA                                               |
| <b>UCIAMS-70423</b>   | <b>11</b>      | <b>5</b> | <b>227-237</b>          | <b>II</b> | <b>wood chip</b>    | <b>3505 ± 20</b>    | <b>3839 - 3704</b>     | <b>Artifact, DhRp-52:15397: within sediment S6W</b>              |
| <b>UCIAMS-70424</b>   | <b>12</b>      | <b>3</b> | <b>272.2-283.2</b>      | <b>II</b> | <b>wood chip</b>    | <b>3475 ± 20</b>    | <b>3830 - 3691</b>     | <b>Artifact, DhRp-52:15147: within sediment S7W</b>              |
| <b>UCIAMS-70425</b>   | <b>13</b>      | <b>8</b> | <b>224.8-234.8</b>      | <b>II</b> | <b>wood chip</b>    | <b>3415 ± 20</b>    | <b>3718 - 3589</b>     | <b>Artifact, DhRp-52:15423: within sediment S5W</b>              |
| UCIAMS-70426          | 16             | 2        | 191.5-236.5             | IV        | S. latifolia        | 3230 ± 20           | 3480 - 3386            | Ecofact, DhRp-52:85: located in sediment S3W                     |
| <b>UCIAMS-70427</b>   | <b>13</b>      | <b>2</b> | <b>227.7-237.7</b>      | <b>II</b> | <b>S. latifolia</b> | <b>3085 ± 20</b>    | <b>3365 - 3254</b>     | <b>Ecofact, DhRp-52:29956: located in sediment S3W above SRP</b> |

table S2. Frequency and distribution of abundant seed taxa in the garden deposits at DhRp-52.

| Deposit              | Frequency (n)             |                                    |                               |                                     |                                    |                                      | Deposit              | Distribution (%) <sup>1</sup> |                                    |                               |                                     |                                    |                                      | NIT <sup>2</sup> |
|----------------------|---------------------------|------------------------------------|-------------------------------|-------------------------------------|------------------------------------|--------------------------------------|----------------------|-------------------------------|------------------------------------|-------------------------------|-------------------------------------|------------------------------------|--------------------------------------|------------------|
|                      | <i>Carex</i> spp. (Sedge) | <i>Eleocharis</i> spp. (Spikerush) | <i>Galium</i> spp. (Bedstraw) | <i>Najas flexilis</i> (Water-nymph) | <i>Potamogeton</i> spp. (Pondweed) | <i>Sagittaria latifolia</i> (Wapato) |                      | <i>Carex</i> spp. (Sedge)     | <i>Eleocharis</i> spp. (Spikerush) | <i>Galium</i> spp. (Bedstraw) | <i>Najas flexilis</i> (Water-nymph) | <i>Potamogeton</i> spp. (Pondweed) | <i>Sagittaria latifolia</i> (Wapato) |                  |
| <b>S2W</b>           | 155.5                     | 154.0                              | 264.5                         | 48.0                                | 144.0                              | 20.0                                 | <b>S2W</b>           | 38.40                         | 33.12                              | 35.34                         | 6.21                                | 33.41                              | 23.53                                | 19               |
| <b>S3W above</b>     | 6.0                       | 187.0                              | 106.0                         | 319.0                               | 118.0                              | 17.0                                 | <b>S3W above</b>     | 1.48                          | 40.22                              | 14.16                         | 41.27                               | 27.38                              | 20.0                                 | 21               |
| <b>Rock Pavement</b> | 196.5                     | 120.0                              | 191.0                         | 359.5                               | 167.0                              | 28.0                                 | <b>Rock Pavement</b> | 48.52                         | 25.81                              | 25.52                         | 46.51                               | 38.75                              | 32.94                                | 20               |
| <b>S3W below</b>     | 41.0                      | 3.0                                | 148.0                         | 36.5                                | 2.0                                | 20.0                                 | <b>S3W below</b>     | 10.12                         | 0.64                               | 19.77                         | 4.72                                | 0.46                               | 23.53                                | 17               |
| <b>S7W/S9W</b>       | 6.0                       | 1.0                                | 39.0                          | 10.0                                | 0                                  | 0                                    | <b>S7W/S9W</b>       | 1.48                          | 0.21                               | 5.21                          | 1.29                                | 0                                  | 0                                    | 9                |
| <b>Total</b>         | 405.0                     | 465.0                              | 748.5                         | 773.0                               | 431.0                              | 85.0                                 | <b>Total</b>         | 100.0                         | 100.0                              | 100.0                         | 100.0                               | 100.0                              | 100.0                                | 26               |

1. Percentages are calculated independently for each taxon.

2. This measure is based on the full set of identified seed data from DhRp-52. In this table we present the 5 most abundant species and wapato.

**table S3. Total counts of perishable artifacts from DhRp-52.** Area II refers to the wet-site deposits.

| Perishable Objects             |                                          | No. within Area I | No. within Area II | No. within Area IV | Unknown | Total Counts |
|--------------------------------|------------------------------------------|-------------------|--------------------|--------------------|---------|--------------|
| <i>Artifacts</i>               |                                          |                   |                    |                    |         |              |
| Basketry                       | Tumpline                                 |                   | 1                  |                    |         | 1            |
| Cordage                        | Cordage Rings                            |                   | 22                 |                    |         | 22           |
|                                | Linear Cordage                           |                   |                    |                    |         |              |
|                                | <i>Braided Bark</i>                      |                   | 1                  |                    |         | 1            |
|                                | <i>Twisted Multi-Strand Bark</i>         |                   | 3                  |                    |         | 3            |
|                                | <i>Twisted Multi-Strand Wood Fibre</i>   |                   | 2                  |                    |         | 2            |
|                                | Knots                                    |                   | 3                  |                    |         | 3            |
|                                | Cordage Waste                            | 8                 | 223                |                    |         | 231          |
| Worked Wood                    | Implement Tip Fragments                  | 20                | 160                |                    | 4       | 184          |
|                                | Implement Shaft Fragments                |                   | 6                  |                    |         | 6            |
|                                | Miscellaneous Wood Artifacts             |                   | 12                 |                    |         | 12           |
|                                | Possible Stakes                          |                   | 12                 |                    |         | 12           |
|                                | Woodworking Debitage                     |                   |                    |                    |         |              |
|                                | <i>Wood Chips</i>                        | 185               | 11,346             | 5                  | 625     | 12,161       |
|                                | <i>Wood Chunks</i>                       | 6                 | 78                 | 2                  | 2       | 88           |
| Worked Bark                    | Curled Bark Pieces                       | 133               | 1                  | 1                  |         | 135          |
|                                | Pounded Bark Pieces                      |                   | 27                 |                    |         | 27           |
|                                | Stripped Bark Pieces                     | 1                 | 69                 |                    |         | 70           |
|                                | Miscellaneous Bark Pieces                |                   | 3                  |                    |         | 3            |
| <i>Macro-Botanical Remains</i> |                                          |                   |                    |                    |         |              |
| Economic Ecofacts              | <i>Corylus cornuta</i> (Beaked Hazelnut) | 214               | 2,999              |                    |         | 3,213        |
|                                | <i>Sagittaria latifolia</i> (Wapato)     | 354               | 3,289              | 124                |         | 3,767        |

**table S4. Species identification of a sample of perishable artifacts excavated from DhRp-52 wet-site (area II) deposits.**

| Artifact Number<br>DhRp-52: | Artifact Type            | Taxon                                  | Common Name         | Plant Part             | Site Area | Locus           | Matrix Code                     | Cultural Component |
|-----------------------------|--------------------------|----------------------------------------|---------------------|------------------------|-----------|-----------------|---------------------------------|--------------------|
| 166                         | Implement Tip Fragment   | <i>Abies</i> or <i>Tsuga</i> sp.       | true fir or hemlock | limb, compression wood | II        | Garden Patch    | Submerged Rock Pavement feature | Late               |
| 257                         | Implement Tip Fragment   | <i>Abies</i> or <i>Tsuga</i> sp.       | true fir or hemlock | limb, compression wood | II        | Midden          | S6W                             | Late               |
| 234                         | Cordage Ring             |                                        | conifer             | root or possibly bough | II        | Transition/Bank | S3W                             | Late               |
| 49                          | Implement Tip Fragment   | <i>Taxus</i> sp.                       | yew                 | limb, compression wood | II        | Garden Patch    | S3W                             | Late               |
| 51                          | Implement Tip Fragment   | <i>Taxus</i> sp.                       | yew                 | wood                   | II        | Garden Patch    | S3W                             | Late               |
| 76                          | Implement Shaft Fragment | <i>Taxus</i> sp.                       | yew                 | limb, compression wood | II        | Garden Patch    | S3W                             | Late               |
| 177                         | Tumpline                 | <i>Thuja plicata</i> inner bark fibers | red cedar           | inner bark             | II        | Transition/Bank | Submerged Rock Pavement feature | Late               |
| 300                         | Pounded Bark             | <i>Thuja plicata</i> inner bark fibers | red cedar           | limb, compression wood | II        | Transition/Bank | S5W                             | Late               |
| 59                          | Implement Tip Fragment   | <i>Tsuga</i> or <i>Abies</i> sp.       | hemlock or true fir | limb, compression wood | I         | -               | S3W                             | Late               |
| 124                         | Implement Tip Fragment   | <i>Tsuga</i> or <i>Abies</i> sp.       | hemlock or true fir | limb, compression wood | II        | Midden          | S5W                             | Late               |
| 139                         | Implement Tip Fragment   | <i>Tsuga</i> or <i>Abies</i> sp.       | hemlock or true fir | limb, compression wood | II        | Midden          | S6W                             | Late               |
| 293                         | Implement Tip Fragment   | <i>Tsuga</i> or <i>Abies</i> sp.       | hemlock or true fir | limb, compression wood | II        | Garden Patch    | Submerged Rock Pavement feature | Late               |
| 15147                       | Wood Chip                | <i>Tsuga</i> or <i>Abies</i> sp.       | hemlock or true fir | limb, compression wood | II        | Midden          | S7W                             | Middle-Late        |
| 15397                       | Wood Chip                | <i>Tsuga</i> or <i>Abies</i> sp.       | hemlock or true fir | limb, compression wood | II        | Midden          | S6W                             | Late               |
| 15423                       | Wood Chip                | <i>Tsuga</i> or <i>Abies</i> sp.       | hemlock or true fir | limb, compression wood | II        | Midden          | S5W                             | Late               |
| 55                          | Implement Tip Fragment   | <i>Tsuga</i> sp.                       | hemlock             | limb, compression wood | II        | Garden Patch    | S3W                             | Late               |
| 57                          | Implement Tip Fragment   | possible <i>Tsuga</i> sp.              | hemlock             | limb, compression wood | I         | -               | S3W                             | Late               |
| 206                         | Implement Tip Fragment   | possible <i>Tsuga</i> sp.              | hemlock             | limb, compression wood | II        | Transition/Bank | S5W                             | Late               |
